# Supplementary material for: Translatome analysis of tuberous sclerosis complex 1 patient-derived neural progenitor cells reveals rapamycin-dependent and independent alterations
Source: Mol Autism. 2023 Oct 25;14:39. doi: 10.1186/s13229-023-00572-3 (PMC10601155; doi:10.1186/s13229-023-00572-3)
Supplement: Supplementary file 7 — Additional file 7. Differentially translated genes in TSC1−/− as compared to TSC1+/+ NPCs related to ASD, NDD and synaptic activity that are sensitive to RMC-6272 but not rapamycin treatment. [file 13229_2023_572_MOESM7_ESM.xlsx]

## Sheet: Sheet2
Gene Symbol	Gene name	Direction of translation in TSC1-null NPCs	References
ADNP	Activity-dependent neuroprotector homeobox	Translation Down	1
AUTS2	Activator of transcription and developmental regulator AUTS2	Translation Down	1
NIPBL	Nipped-B-like	Translation Down	1
PCDH19	Protocadherin 19	Translation Down	2
UCHL1	Ubiquitin C-Terminal Hydrolase L1	Translation Up	3
TPM2	Tropomyosin 2	Translation Up	3
Table S6. Differentially translated genes in TSC1-/- NPCs related to ASD, NDD and synaptic activity that are sensitive to RMC-6272 but not rapamycin treatment. 1 Fu et al. Nature Genet. 2020, 2 Satterstrom, et al. Cell. 2020, 3 Gupta et al. Nat Commun. 2014.
